# Supplementary material for: Robust, Precise, and Deep Proteome Profiling Using a Small Mass Range and Narrow Window Data-Independent-Acquisition Scheme
Source: PubMed Central journal article supplement (PMC10913089; doi:10.1021/acs.jproteome.3c00736), 2024-01-26
Supplement: pr3c00736_si_001.pdf [file pr3c00736_si_001.pdf]

# Supplementary Information

## Robust, Precise and Deep Proteome Profiling Using a Small Mass Range and Narrow Window Data-Independent-Acquisition Scheme

‡Klemens Fröhlich <sup>1</sup>, ‡Regula Furrer <sup>2</sup>, Christian Schori <sup>1</sup>, Christoph Handschin <sup>2</sup>, Alexander Schmidt <sup>1\*</sup>

‡ contributed equally

\* corresponding author

1. Proteomics Core Facility, Biozentrum Basel, University of Basel, 4056 Basel, Switzerland
2. Biozentrum Basel, University of Basel, 4056 Basel, Switzerland

### Table of Contents:

**Supplementary Figure S1.** Assessment of quantitative accuracy in spike-in experiment.

**Supplementary Figure S2.** CVs of the original Kawashima method as published by Kawashima et al.

**Supplementary Figure S3.** Mass range distribution of precursors in representative DIA experiments without using FAIMS.

**Supplementary Figure S4.** Effect of Maximum Injection Time and Resolution on Identifications.

**Supplementary Figure S5.** Protein CVs over protein intensities.

**Supplementary Figure S6.** Intensity distribution of identified muscle proteins as compared to a reference dataset.

**Supplementary Figure S7.** STRING-DB analysis: WikiPathway enrichment analysis.

26 **Supplementary Table 1.** Number of Identified Precursors as Displayed in Figure 1

27 **Supplementary Table 2.** Number of Identified Proteins as displayed in Figure 1

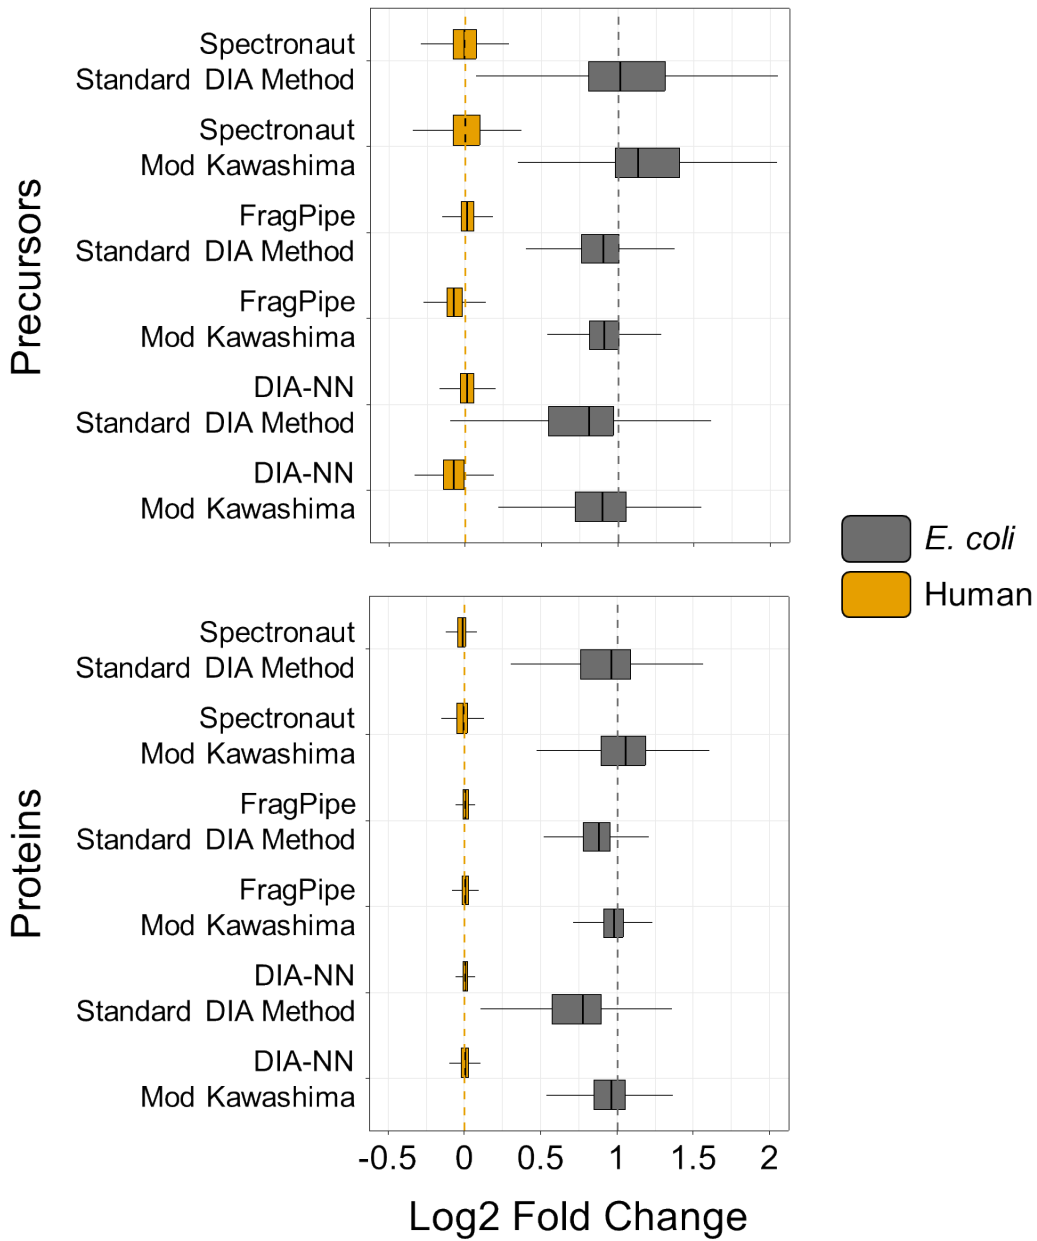

28

29 **Supplementary Figure S1.** Assessment of quantitative accuracy in spike-in experiment. 1:10 vs.

30 1:20 *E. coli* spike-in dataset was measured using either a modified Kawashima method (4 m/z

31 windows, 500-740 m/z mass range, 30,000 MS2 resolution, staggered window placement, no

32 FAIMS) or the DIA Standard Method (8 m/z windows, 400 - 900 m/z mass range, 15,000 MS2

33 resolution, no staggering / overlapping window placement, no FAIMS). Dotted lines represent the  
34 theoretical fold changes (0 for human, 1 for *E. coli*).

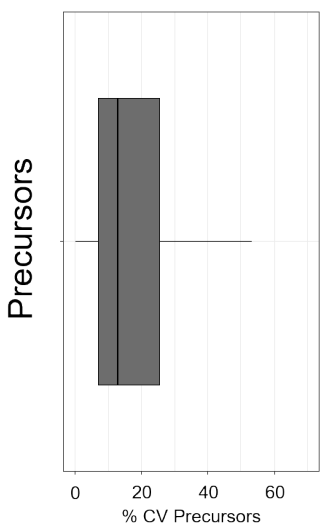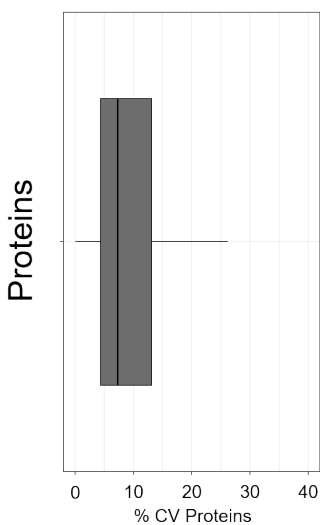

35  
36 **Supplementary Figure S2.** CVs of the original Kawashima method as published by Kawashima et  
37 al. Original raw data was downloaded and reanalyzed by DIA-NN. The triplicate injection used in

38 this analysis is the 1000 ng loading suggested by the authors to be used for optimal coverage

39 results.

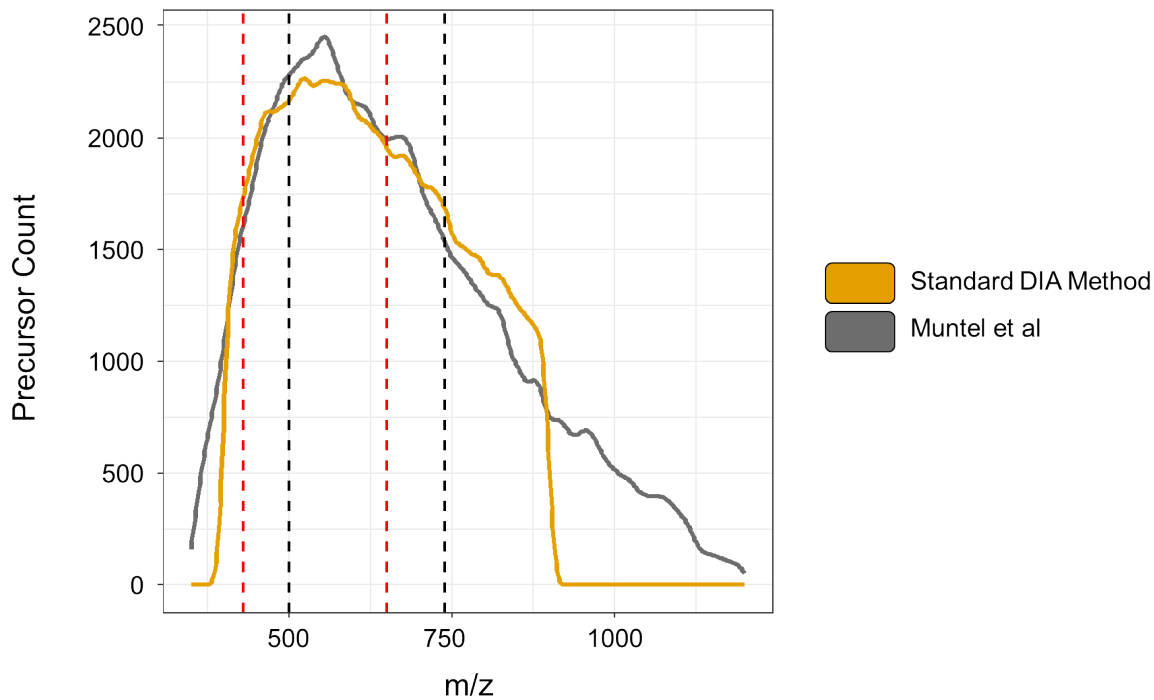

40

41 **Supplementary Figure S3.** Mass range distribution of precursors in representative DIA  
 42 experiments without using FAIMS. Black dotted lines: Mass Range chosen by Kawashima for an  
 43 optimized workflow using FAIMS. Red dotted lines: Proposed mass range for maximum number  
 44 of precursor identification without using FAIMS. Both Standard DIA Method and Muntel et al  
 45 data have been obtained without FAIMS. Only identifications < 1200 m/z are displayed.

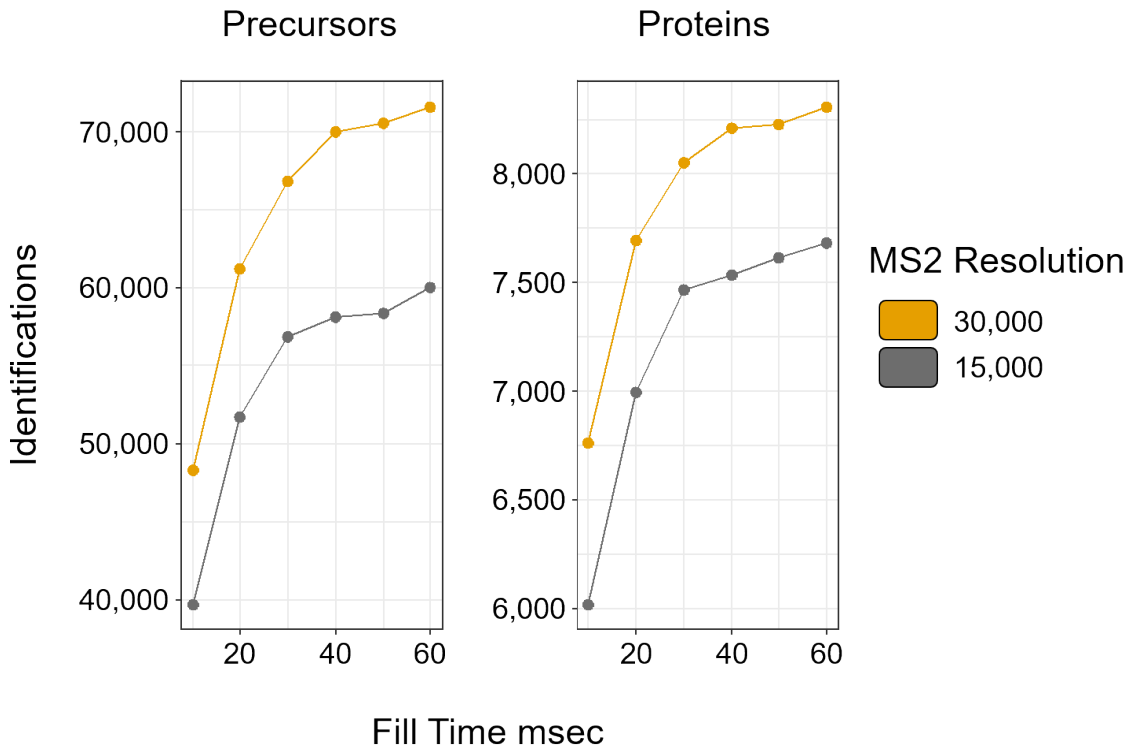

46

47 **Supplementary Figure S4.** Effect of Maximum Injection Time and Resolution on Identifications.

48 HEK lysate was repeatedly injected using different fill times and different fragment spectrum

49 resolution. Data analysis was carried out using DIA-NN without MBR and therefore without

50 library refinement to avoid alignment of identifications from other measurements.

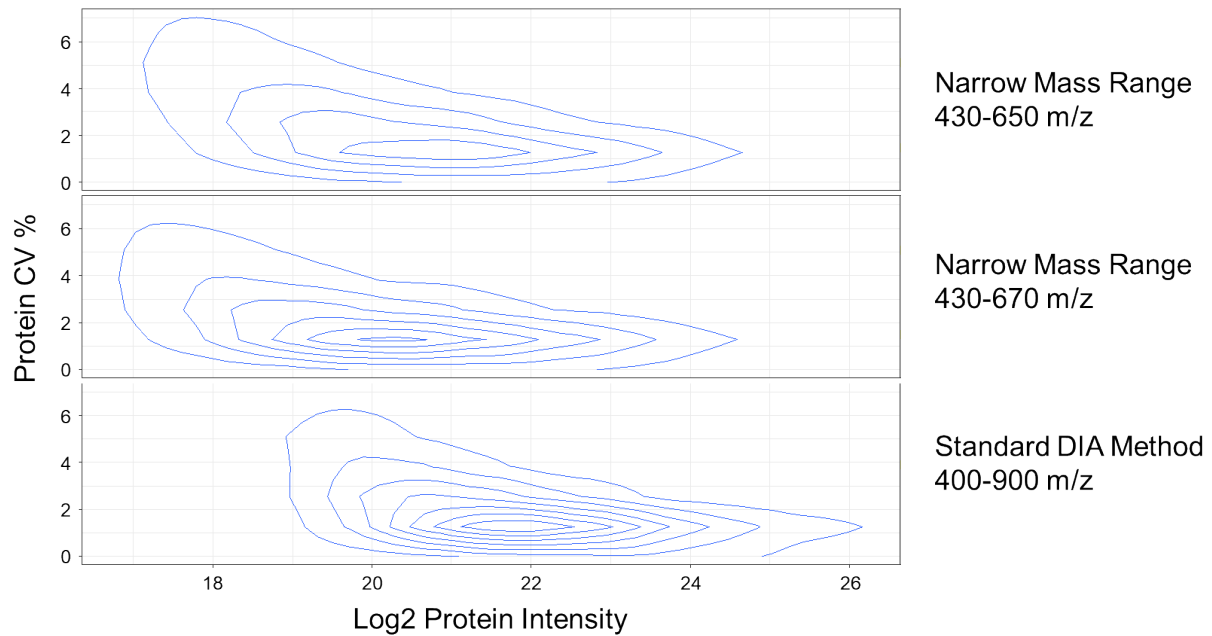

51

52 **Supplementary Figure S5.** Protein CVs over protein intensities. Narrow Mass Range 430 - 650 m/z

53 = 4 m/z windows (no overlap) at 30,000 resolution covering 430 - 650 m/z without using FAIMS.

54 Narrow Mass Range 430 - 670 m/z = same as 430 - 650 but covering a larger mass range. DIA

55 Standard Method = 8 m/z windows + 1 m/z overlap at 15,000 resolution covering 400 - 900 m/z.

56 Protein CVs distribution is depicted over Protein intensity as 2D density map.



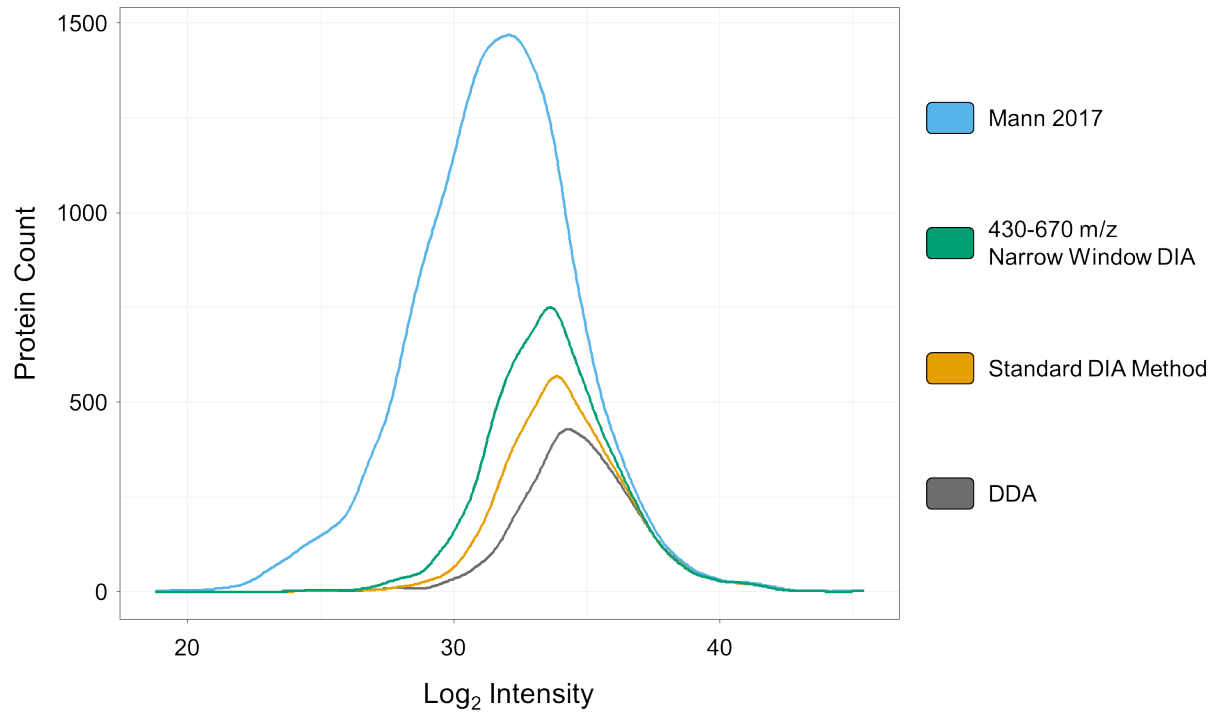

57

58 **Supplementary Figure S6.** Intensity distribution of identified muscle proteins as compared to a  
 59 reference dataset. Identified proteins of the mouse muscle investigation were compared to a near  
 60 comprehensive murine muscle dataset. The dataset was reanalyzed using FragPipe and the  
 61 intensities were copied from the reference dataset to the identified proteins to our own experiments.

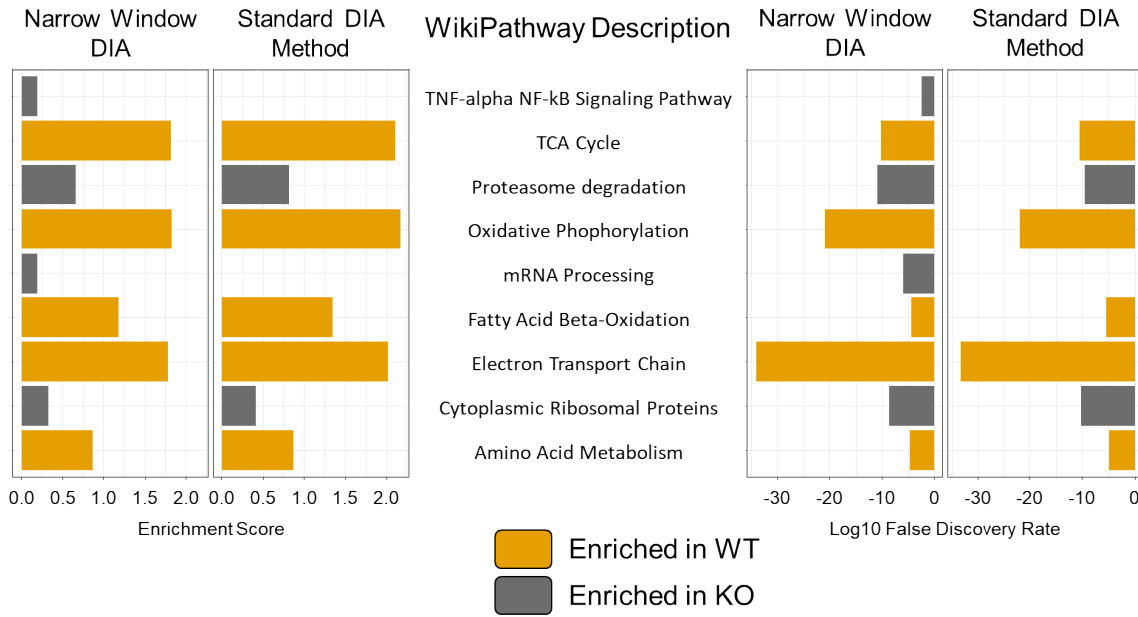

62

63 **Supplementary Figure S7. STRING-DB analysis: WikiPathway enrichment analysis. Identified**

64 WikiPathway activity of the mouse muscle investigation as determined by the DIA Standard

65 Method and the Narrow Mass Range method. The enrichment score of all identified WikiPathways

66 is depicted on the left and the log10(FDR) is depicted on the right. Colors: Top (orange) is enriched

67 in KO, whereas Bottom (gray) is enriched in WT.

68

| Origin          | Species | Condition | Method    | Software       | Mean   | SD  |
|-----------------|---------|-----------|-----------|----------------|--------|-----|
| DIANN181_Kawash | ECOLI   | EC_high   | Kawashima | DIA-NN 1.8.1   | 5095   | 17  |
| DIANN181_Kawash | ECOLI   | EC_low    | Kawashima | DIA-NN 1.8.1   | 4381   | 19  |
| DIANN181_Kawash | ECOLI   | HEK       | Kawashima | DIA-NN 1.8.1   | 288    | 5   |
| DIANN181_Kawash | HUMAN   | EC_high   | Kawashima | DIA-NN 1.8.1   | 94605  | 252 |
| DIANN181_Kawash | HUMAN   | EC_low    | Kawashima | DIA-NN 1.8.1   | 94834  | 239 |
| DIANN181_Kawash | HUMAN   | HEK       | Kawashima | DIA-NN 1.8.1   | 94375  | 337 |
| DIANN181_Searle | ECOLI   | EC_high   | Standard  | DIA-NN 1.8.1   | 3687   | 6   |
| DIANN181_Searle | ECOLI   | EC_low    | Standard  | DIA-NN 1.8.1   | 2970   | 44  |
| DIANN181_Searle | ECOLI   | HEK       | Standard  | DIA-NN 1.8.1   | 185    | 5   |
| DIANN181_Searle | HUMAN   | EC_high   | Standard  | DIA-NN 1.8.1   | 97465  | 302 |
| DIANN181_Searle | HUMAN   | EC_low    | Standard  | DIA-NN 1.8.1   | 97487  | 293 |
| DIANN181_Searle | HUMAN   | HEK       | Standard  | DIA-NN 1.8.1   | 96699  | 242 |
| FP19_Kawash     | ECOLI   | EC_high   | Kawashima | FragPipe 19    | 2894   | 3   |
| FP19_Kawash     | ECOLI   | EC_low    | Kawashima | FragPipe 19    | 2812   | 10  |
| FP19_Kawash     | ECOLI   | HEK       | Kawashima | FragPipe 19    | 88     | 9   |
| FP19_Kawash     | HUMAN   | EC_high   | Kawashima | FragPipe 19    | 78791  | 44  |
| FP19_Kawash     | HUMAN   | EC_low    | Kawashima | FragPipe 19    | 78792  | 51  |
| FP19_Kawash     | HUMAN   | HEK       | Kawashima | FragPipe 19    | 78713  | 85  |
| FP19_Searle     | ECOLI   | EC_high   | Standard  | FragPipe 19    | 2067   | 4   |
| FP19_Searle     | ECOLI   | EC_low    | Standard  | FragPipe 19    | 1938   | 8   |
| FP19_Searle     | ECOLI   | HEK       | Standard  | FragPipe 19    | 68     | 9   |
| FP19_Searle     | HUMAN   | EC_high   | Standard  | FragPipe 19    | 76695  | 33  |
| FP19_Searle     | HUMAN   | EC_low    | Standard  | FragPipe 19    | 76724  | 140 |
| FP19_Searle     | HUMAN   | HEK       | Standard  | FragPipe 19    | 76721  | 97  |
| SN17_Kawash     | ECOLI   | EC_high   | Kawashima | Spectronaut 17 | 4409   | 12  |
| SN17_Kawash     | ECOLI   | EC_low    | Kawashima | Spectronaut 17 | 4153   | 33  |
| SN17_Kawash     | ECOLI   | HEK       | Kawashima | Spectronaut 17 | 267    | 32  |
| SN17_Kawash     | HUMAN   | EC_high   | Kawashima | Spectronaut 17 | 99988  | 472 |
| SN17_Kawash     | HUMAN   | EC_low    | Kawashima | Spectronaut 17 | 99937  | 217 |
| SN17_Kawash     | HUMAN   | HEK       | Kawashima | Spectronaut 17 | 98892  | 171 |
| SN17_Searle     | ECOLI   | EC_high   | Standard  | Spectronaut 17 | 4077   | 2   |
| SN17_Searle     | ECOLI   | EC_low    | Standard  | Spectronaut 17 | 3980   | 11  |
| SN17_Searle     | ECOLI   | HEK       | Standard  | Spectronaut 17 | 377    | 26  |
| SN17_Searle     | HUMAN   | EC_high   | Standard  | Spectronaut 17 | 121582 | 29  |
| SN17_Searle     | HUMAN   | EC_low    | Standard  | Spectronaut 17 | 121586 | 45  |
| SN17_Searle     | HUMAN   | HEK       | Standard  | Spectronaut 17 | 120598 | 161 |

69

70 **Supplementary Table 1.** Number of Identified Precursors as Displayed in Figure 1

| Origin          | Species | Condition | Method    | Software       | Mean | SD |
|-----------------|---------|-----------|-----------|----------------|------|----|
| DIANN181_Kawash | ECOLI   | EC_high   | Kawashima | DIA-NN 1.8.1   | 1062 | 3  |
| DIANN181_Kawash | ECOLI   | EC_low    | Kawashima | DIA-NN 1.8.1   | 964  | 5  |
| DIANN181_Kawash | ECOLI   | HEK       | Kawashima | DIA-NN 1.8.1   | 55   | 4  |
| DIANN181_Kawash | HUMAN   | EC_high   | Kawashima | DIA-NN 1.8.1   | 9686 | 9  |
| DIANN181_Kawash | HUMAN   | EC_low    | Kawashima | DIA-NN 1.8.1   | 9707 | 36 |
| DIANN181_Kawash | HUMAN   | HEK       | Kawashima | DIA-NN 1.8.1   | 9705 | 39 |
| DIANN181_Searle | ECOLI   | EC_high   | Standard  | DIA-NN 1.8.1   | 640  | 8  |
| DIANN181_Searle | ECOLI   | EC_low    | Standard  | DIA-NN 1.8.1   | 559  | 1  |
| DIANN181_Searle | ECOLI   | HEK       | Standard  | DIA-NN 1.8.1   | 36   | 2  |
| DIANN181_Searle | HUMAN   | EC_high   | Standard  | DIA-NN 1.8.1   | 8074 | 19 |
| DIANN181_Searle | HUMAN   | EC_low    | Standard  | DIA-NN 1.8.1   | 8101 | 14 |
| DIANN181_Searle | HUMAN   | HEK       | Standard  | DIA-NN 1.8.1   | 8042 | 21 |
| FP19_Kawash     | ECOLI   | EC_high   | Kawashima | FragPipe 19    | 728  | 1  |
| FP19_Kawash     | ECOLI   | EC_low    | Kawashima | FragPipe 19    | 714  | 2  |
| FP19_Kawash     | ECOLI   | HEK       | Kawashima | FragPipe 19    | 45   | 2  |
| FP19_Kawash     | HUMAN   | EC_high   | Kawashima | FragPipe 19    | 8610 | 6  |
| FP19_Kawash     | HUMAN   | EC_low    | Kawashima | FragPipe 19    | 8614 | 4  |
| FP19_Kawash     | HUMAN   | HEK       | Kawashima | FragPipe 19    | 8610 | 5  |
| FP19_Searle     | ECOLI   | EC_high   | Standard  | FragPipe 19    | 409  | 1  |
| FP19_Searle     | ECOLI   | EC_low    | Standard  | FragPipe 19    | 397  | 2  |
| FP19_Searle     | ECOLI   | HEK       | Standard  | FragPipe 19    | 30   | 4  |
| FP19_Searle     | HUMAN   | EC_high   | Standard  | FragPipe 19    | 6794 | 2  |
| FP19_Searle     | HUMAN   | EC_low    | Standard  | FragPipe 19    | 6792 | 3  |
| FP19_Searle     | HUMAN   | HEK       | Standard  | FragPipe 19    | 6788 | 3  |
| SN17_Kawash     | ECOLI   | EC_high   | Kawashima | Spectronaut 17 | 855  | 3  |
| SN17_Kawash     | ECOLI   | EC_low    | Kawashima | Spectronaut 17 | 819  | 7  |
| SN17_Kawash     | ECOLI   | HEK       | Kawashima | Spectronaut 17 | 132  | 16 |
| SN17_Kawash     | HUMAN   | EC_high   | Kawashima | Spectronaut 17 | 9142 | 25 |
| SN17_Kawash     | HUMAN   | EC_low    | Kawashima | Spectronaut 17 | 9144 | 8  |
| SN17_Kawash     | HUMAN   | HEK       | Kawashima | Spectronaut 17 | 9107 | 6  |
| SN17_Searle     | ECOLI   | EC_high   | Standard  | Spectronaut 17 | 578  | 1  |
| SN17_Searle     | ECOLI   | EC_low    | Standard  | Spectronaut 17 | 555  | 5  |
| SN17_Searle     | ECOLI   | HEK       | Standard  | Spectronaut 17 | 105  | 13 |
| SN17_Searle     | HUMAN   | EC_high   | Standard  | Spectronaut 17 | 7831 | 6  |
| SN17_Searle     | HUMAN   | EC_low    | Standard  | Spectronaut 17 | 7835 | 4  |
| SN17_Searle     | HUMAN   | HEK       | Standard  | Spectronaut 17 | 7815 | 5  |

71

72 **Supplementary Table 2.** Number of Identified Proteins as displayed in Figure 1
